# Supplementary material for: Hard Surface Biocontrol in Hospitals Using Microbial-Based Cleaning Products
Source: PLoS One. 2014 Sep 26;9(9):e108598. doi: 10.1371/journal.pone.0108598 (PMC4178175; doi:10.1371/journal.pone.0108598)
Supplement: Table S1 — Reference criteria for interpretation of the zones of inhibition in the disk diffusion antimicrobial susceptibility test. The table shows the disk diffusion interpretive criteria for the correlation of the diameter (expressed in mm) of the zones of inhibition with the corresponding interpretation, referred as Susceptible (S), Intermediate (I) and Resistant (R), according to the CLSI reference criteria [38]. (XLSX) [file pone.0108598.s001.xlsx]

## Sheet: Table S1
Table S1
		Zone Diameter Interpretive Criteria (mm)
Antimicrobial Agent	Disk Content	S	I	R
Penicillin	10 U	≥19		≤28
Cefoperazone	30 μg	≥21	16-20	≤15
Cefalotin	30 μg	≥18	15-17	≤14
Gentamicin	10 μg	≥15	13-14	≤12
Clindamycin	2 μg	≥21	15-20	≤14
S, I and R are referred to the Susceptible, Intermediate and Resistant categories, respectively.
