# Supplementary material for: Hard Surface Biocontrol in Hospitals Using Microbial-Based Cleaning Products
Source: PLoS One. 2014 Sep 26;9(9):e108598. doi: 10.1371/journal.pone.0108598 (PMC4178175; doi:10.1371/journal.pone.0108598)
Supplement: Table S3 — Statistical analysis on the reduction of Staphylococcus aureus load. Results are expressed as CFU/m2. (XLSX) [file pone.0108598.s003.xlsx]

## Sheet: Foglio1
Table S3
San Giorgio Hospital						Sant'Anna Hospital						AZ Lokeren Hospital
Weeks	Mean CFU/m2 Count	95% CI	Difference between means	P-value		Weeks	Mean CFU/m2 Count	95% CI	Difference between means	P-value		Weeks	Mean CFU/m2 Count	95% CI	Difference between means	P-value
0	8958	7270-10646				0	13746.7	11733-15761				0	5266.8	4734-5799
1	4205	2963-5448	4753	0.0005		1	6916.46	6087-7746	6830	0.0005		0.5	3906.8	3444-4368	1360	0.0005
2	4258	3029-5487	4700	0.0005		2	5574.2	4935-6213	8173	0.0005		1	2400	2051-2749	2867	0.0005
3	3333	2513-4153	5625	0.0005		3	6426.45	5710-7143	7230	0.0005		1.5	1400	1094-1706	3867	0.0005
5	4023	3001-5045	4935	0.0005		4	6215.02	5462-6968	7532	0.0005		2	1253.2	950-1556	4014	0.0005
6	768	384-1152	8190	0.0005		5	7810.69	7144-8477	5936	0.0005		4	1013.2	760-1267	4254	0.0005
7	586	236-935	8372	0.0005		6	5724	413,9-7309	8023	0.0005		8	920	668-1172	4347	0.0005
8	963	489-1437	7995	0.0005								12	960	757-1162	4307	0.0005
11	911	537-1285	8047	0.0005								18	760	547-97525	4507	0.0005
13	1041	597-1486	7917	0.0005								24	626.8	395-858	4640	0.0005
15	234	69-399	8724	0.0005
20	104	0-218	8854	0.0005
24	286	87-485	8672	0.0005
