# Supplementary material for: Hard Surface Biocontrol in Hospitals Using Microbial-Based Cleaning Products
Source: PLoS One. 2014 Sep 26;9(9):e108598. doi: 10.1371/journal.pone.0108598 (PMC4178175; doi:10.1371/journal.pone.0108598)
Supplement: Table S4 — Statistical analysis on the reduction of Clostridium difficile load. Results are expressed as CFU/m2. (XLSX) [file pone.0108598.s004.xlsx]

## Sheet: Foglio1
Table S4
Clostridium difficile
Weeks	Mean CFU/m2 Count	95% CI	Difference between means	P-value
0	425	331-519
0.5	375	285-465	50	1
1	267	168-366	158	0.818
1.5	175	98-252	250	0.057
2	183	83-284	242	0.121
4	125	48-202	300	0.048
8	217	102-331	208	0.203
12	142	50-233	283	0.007
18	83	30-136	342	0.0005
24	108	40-177	317	0.004
